# Supplementary material
Source: MDPI journal article supplement (https://www.mdpi.com/2073-4352/12/8/1038)
Supplement: s1 [file s1]

# Towards the Development of novel Diclofenac Multicomponent Pharmaceutical Solids

Francisco Javier Acebedo-Martínez <sup>1</sup>, Carolina Alarcón-Payer <sup>2</sup>, Helena María Barrales-Ruíz <sup>1,3</sup>, Juan Nicolás-Gutiérrez <sup>3</sup>, Alicia Domínguez-Martín <sup>3</sup> and Duane Choquesillo-Lazarte <sup>1,\*</sup>

**Figure S1.** PXRD patterns of the LAG screening experiments with the coformers of Table 2.

**Figure S2.** PXRD patterns of DIC–ADE, DIC–CYT and DIC–ICT after neat grinding.

**Figure S3.** PXRD patterns of DIC–ADE, DIC–CYT and DIC–ICT after LAG in methanol using different stoichiometries.

**Figure S4.** Experimental PXRD pattern of DIC–ADE, DIC–CYT and DIC–ICT, compared with DIC, coformers and the corresponding calculated powder patterns.

**Figure S5.** TGA traces of DIC–ADE (top), DIC–CYT (middle) and DIC–ICT (bottom).

**Figure S6.** PXRD patterns of DIC–ADE (top), DIC–CYT (middle) and DIC–ICT (bottom) with respect to the stability under accelerated ageing conditions (40 °C, 75% RH) at different time intervals.

**Figure S7.** PXRD patterns of DIC–ADE (top), DIC–CYT (middle) and DIC–ICT (bottom) after the stability slurry assay (at 25 °C, during 24 h, in water).

**Figure S8.** Overlapping UV spectra of diclofenac (DIC) and nucleobase coformers (ADE: adenine, CYT: cytosine, ICT: isocytosine).

**Figure S9.** ORTEP representation showing the asymmetric unit of DIC–ADE with atom numbering scheme (thermal ellipsoids are plotted with the 50% probability level).

**Figure S10.** ORTEP representation showing the asymmetric unit of DIC–CYT with atom numbering scheme (thermal ellipsoids are plotted with the 50% probability level).

**Figure S11.** ORTEP representation showing the asymmetric unit of DIC–ICT with atom numbering scheme (thermal ellipsoids are plotted with the 50% probability level).

**Table S1.** Results of the LAG experiments between DIC and selected coformers.

**Table S2.** Hydrogen bonds for DIC–ADE [Å and deg.].

**Table S3.** Hydrogen bonds for DIC–CYT [Å and deg.].

**Table S4.** Hydrogen bonds for DIC–ICT [Å and deg.].

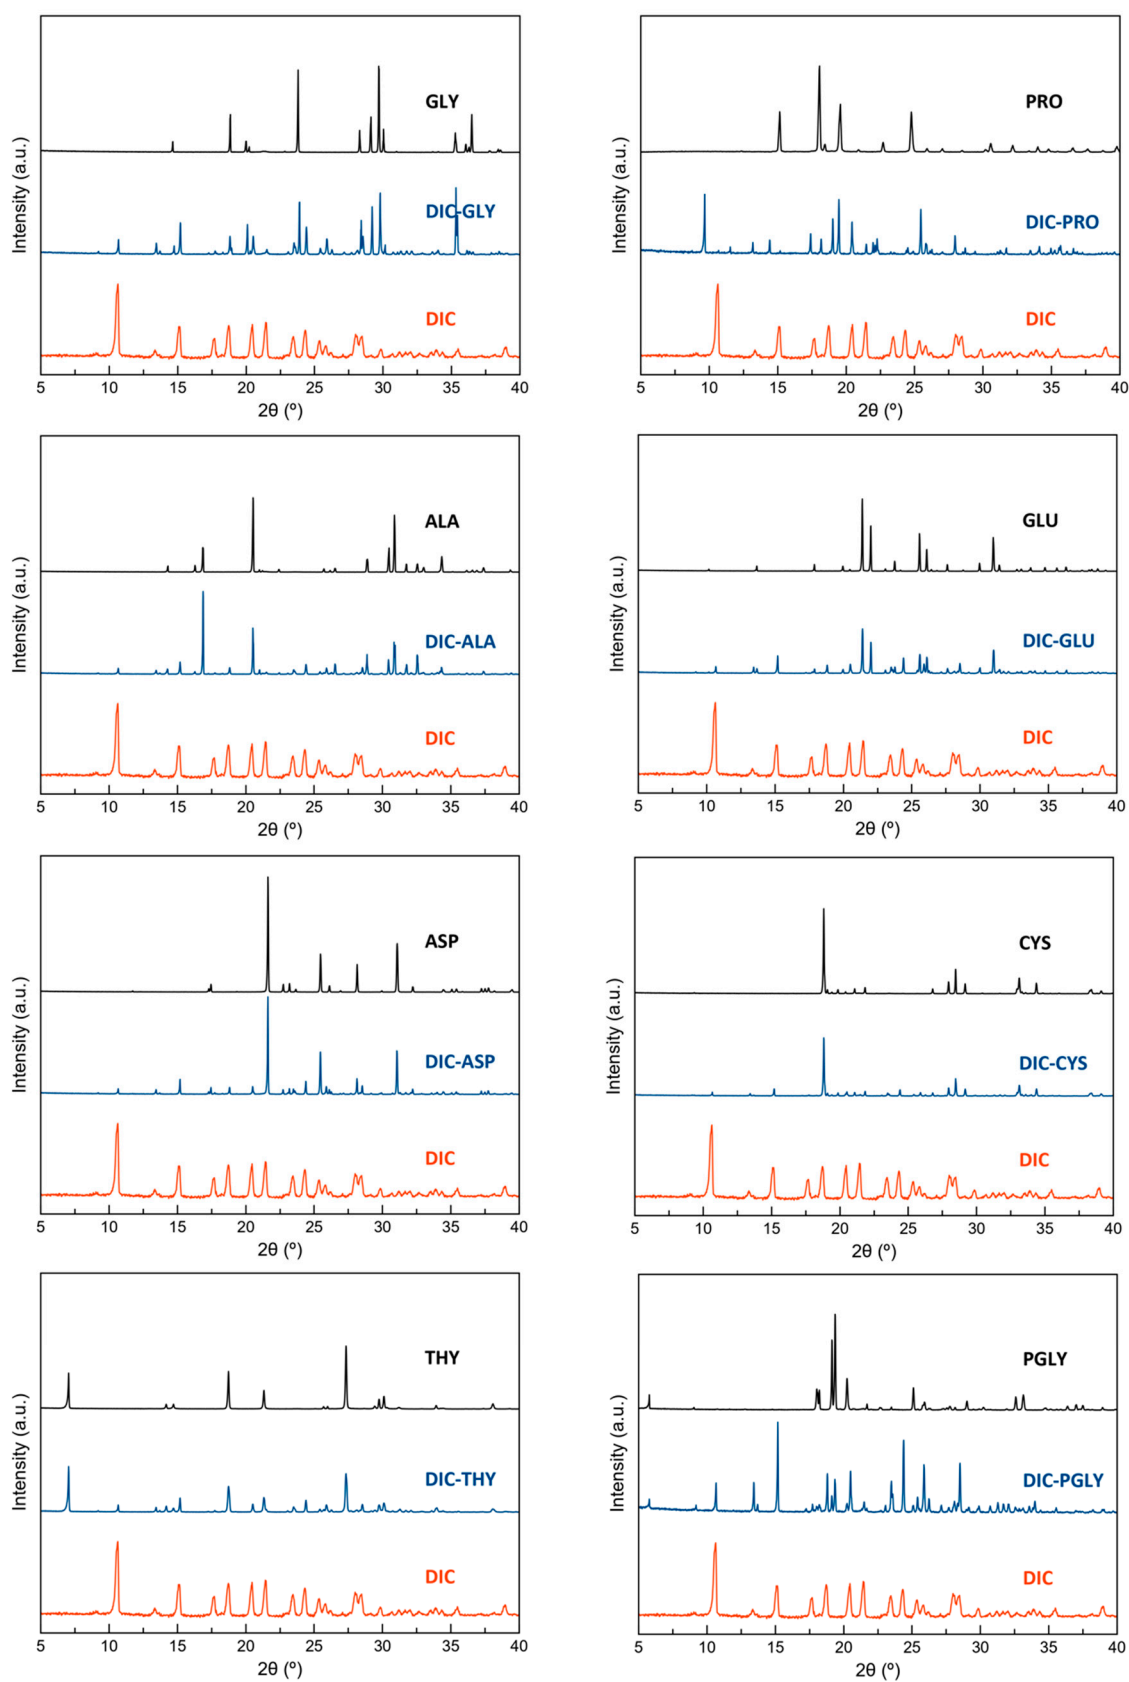

**Figure S1.** PXRD patterns of the LAG screening experiments with the coformers of Table 2. GLY: glycine; PRO: proline; ALA: alanine; GLU: glutamic acid; ASP: aspartic acid; CYS: cysteine; THY: thymine; PGLY: phenylglycine.

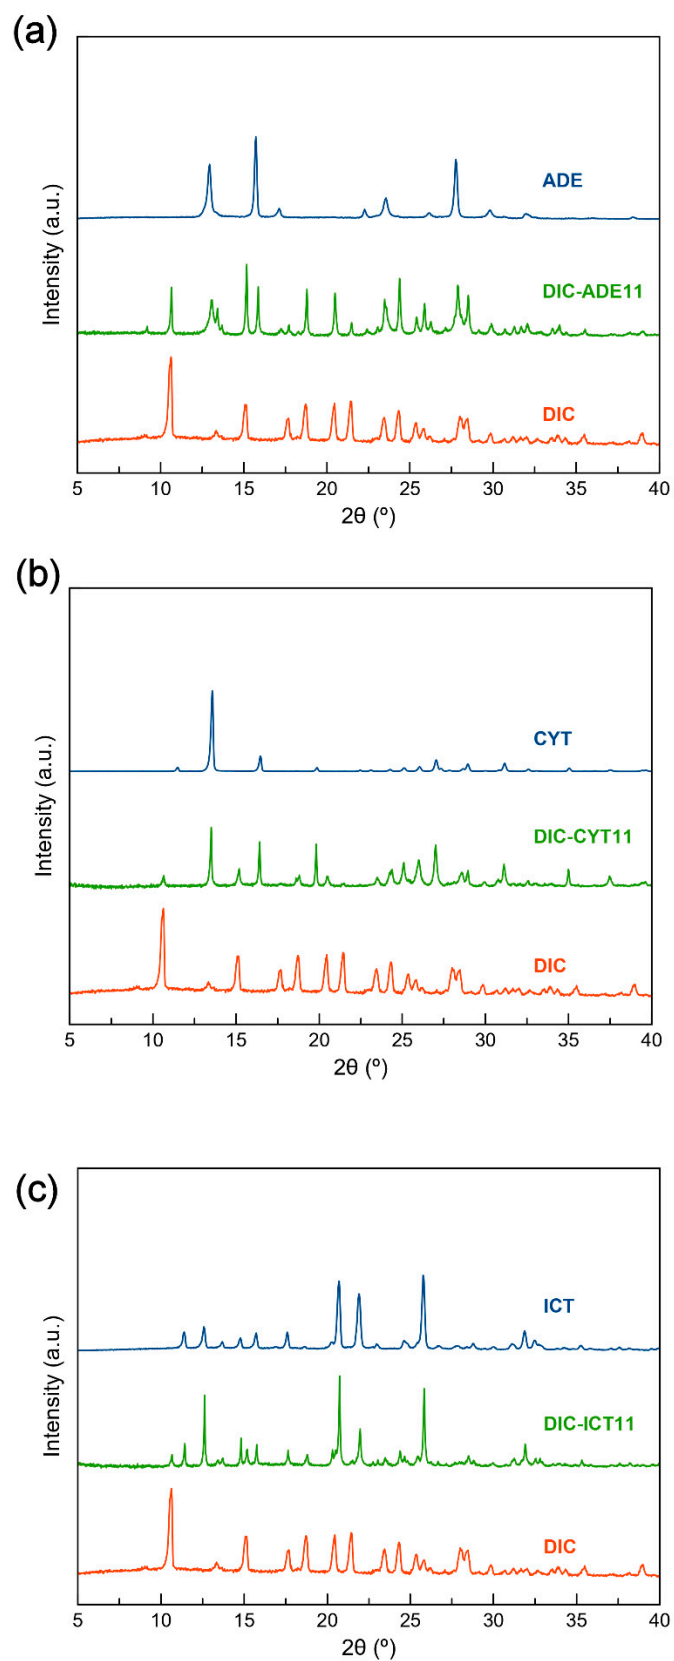

**Figure S2.** PXRD patterns of (a) DIC–ADE, (b) DIC–CYT and (c) DIC–ICT after neat grinding.

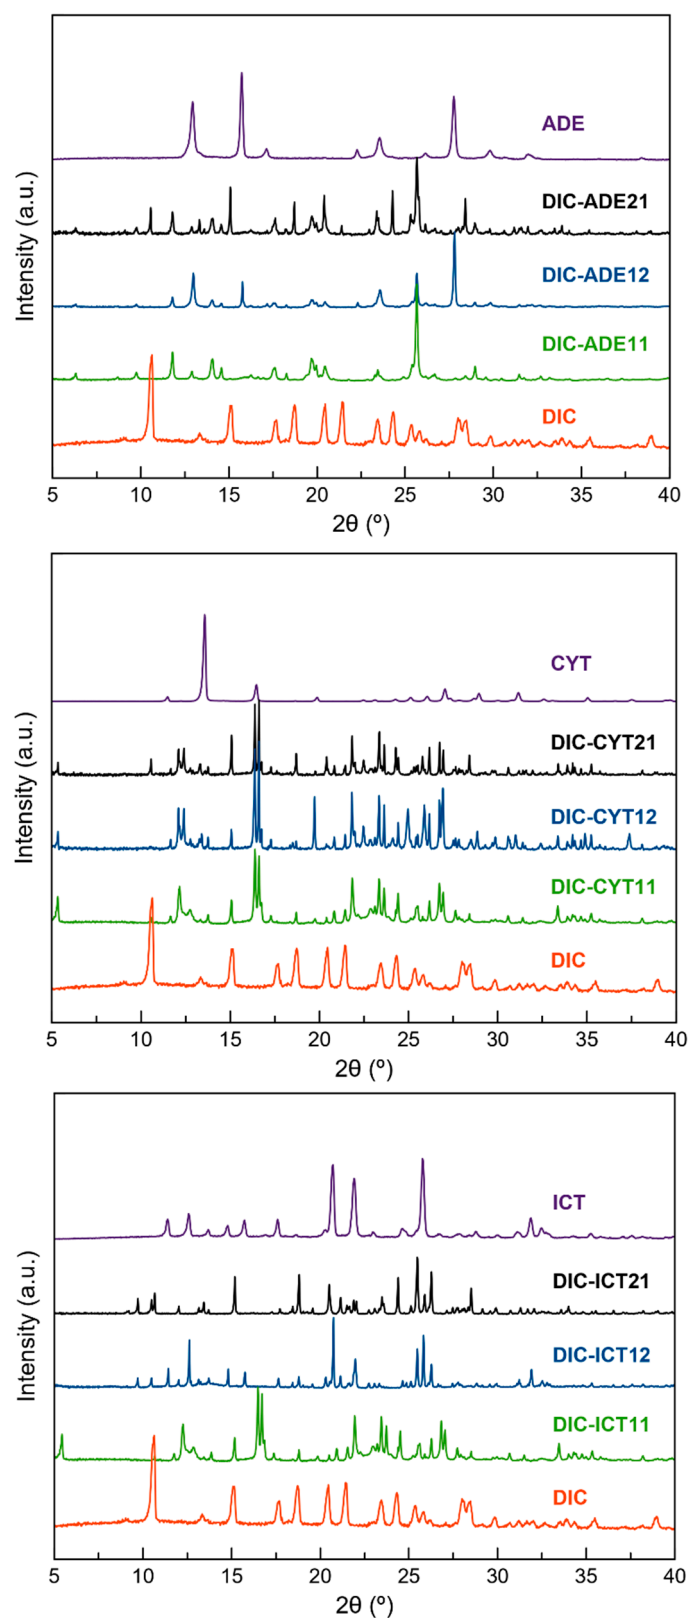

**Figure S3.** PXRD patterns of DIC—ADE (top), DIC—CYT (middle) and DIC—ICT (bottom) after LAG in methanol using different stoichiometries.

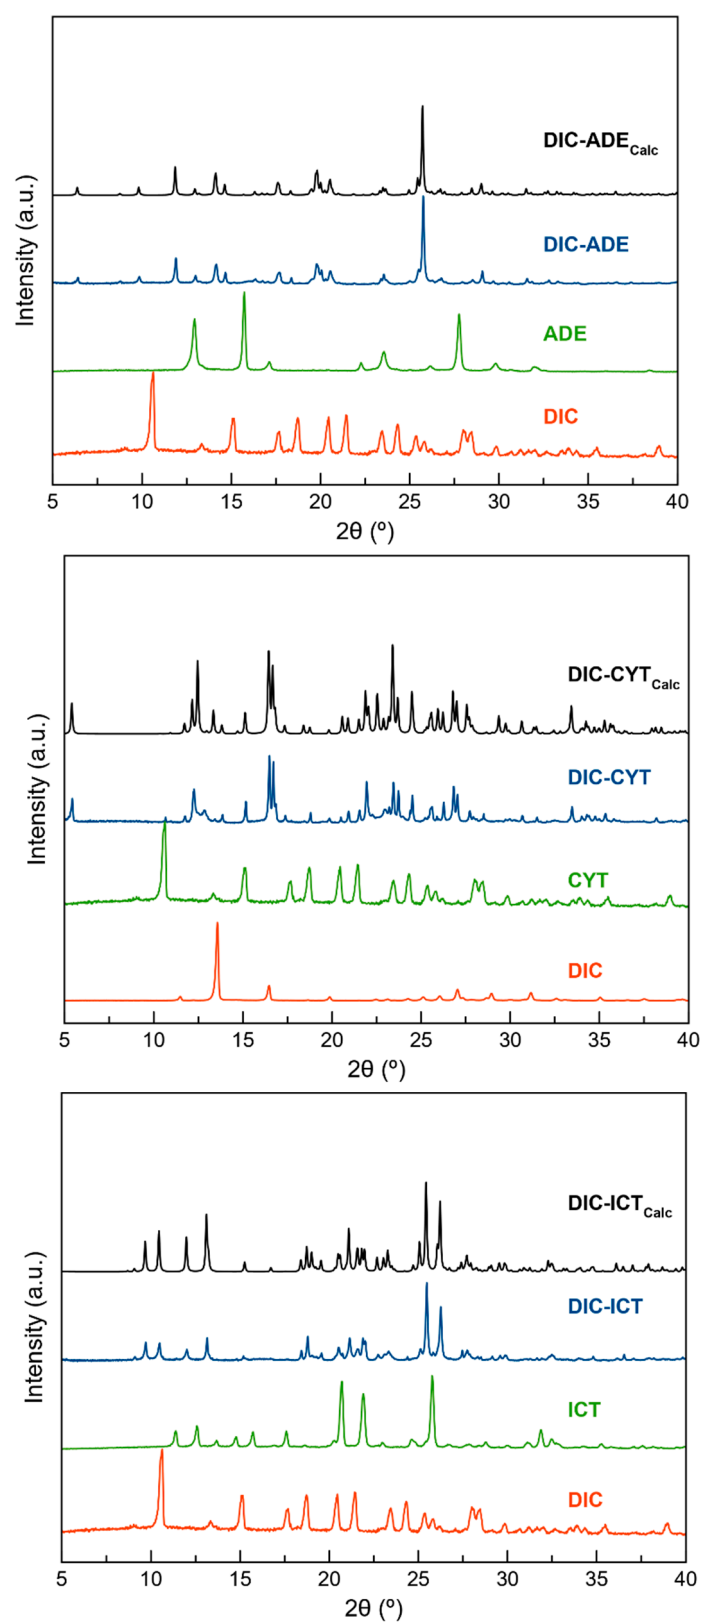

**Figure S4.** Experimental PXRD pattern of DIC—ADE (top), DIC—CYT (middle) and DIC—ICT (bottom), compared with DIC, coformers and the corresponding calculated powder patterns.

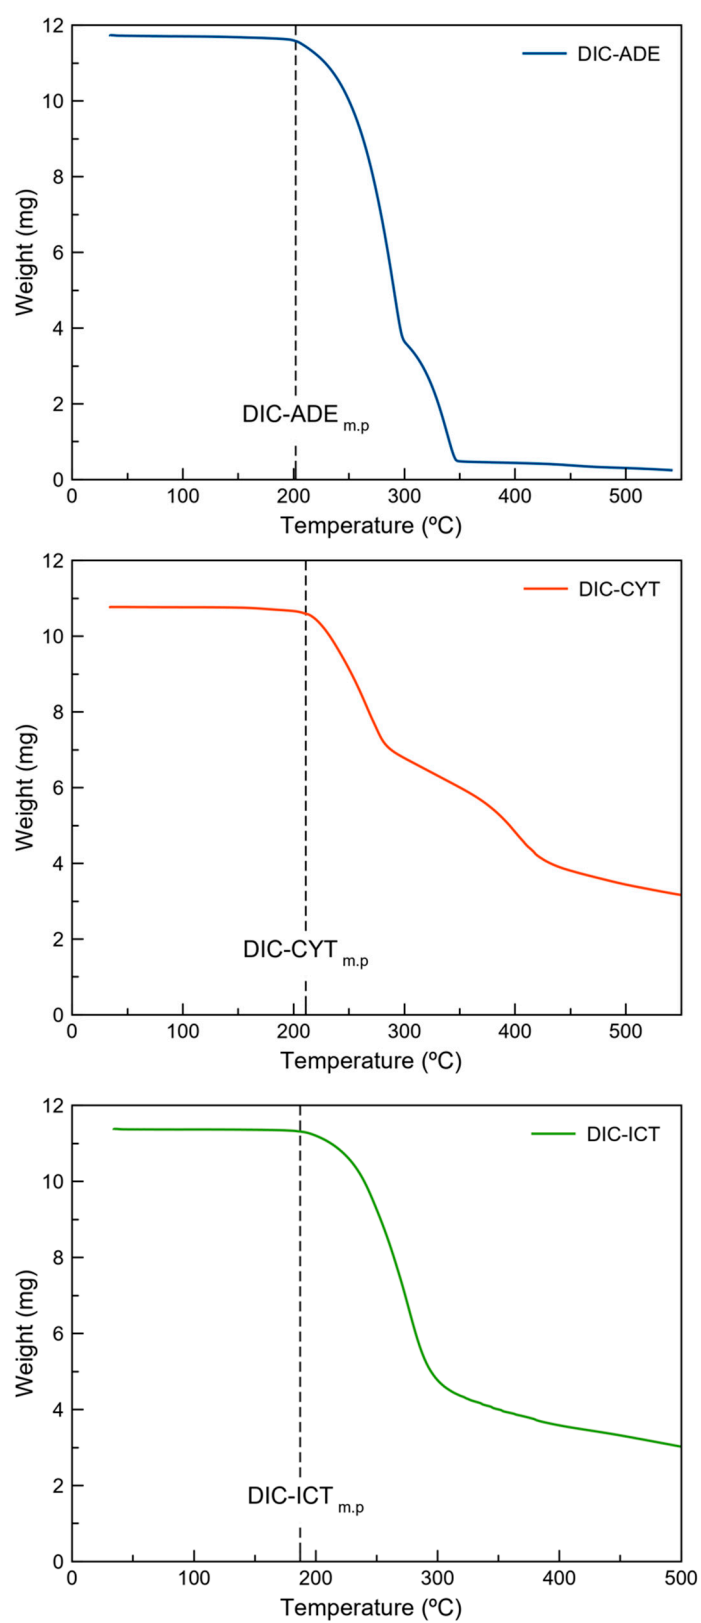

**Figure S5.** TGA traces of DIC–ADE (top), DIC–CYT (middle) and DIC–ICT (bottom).

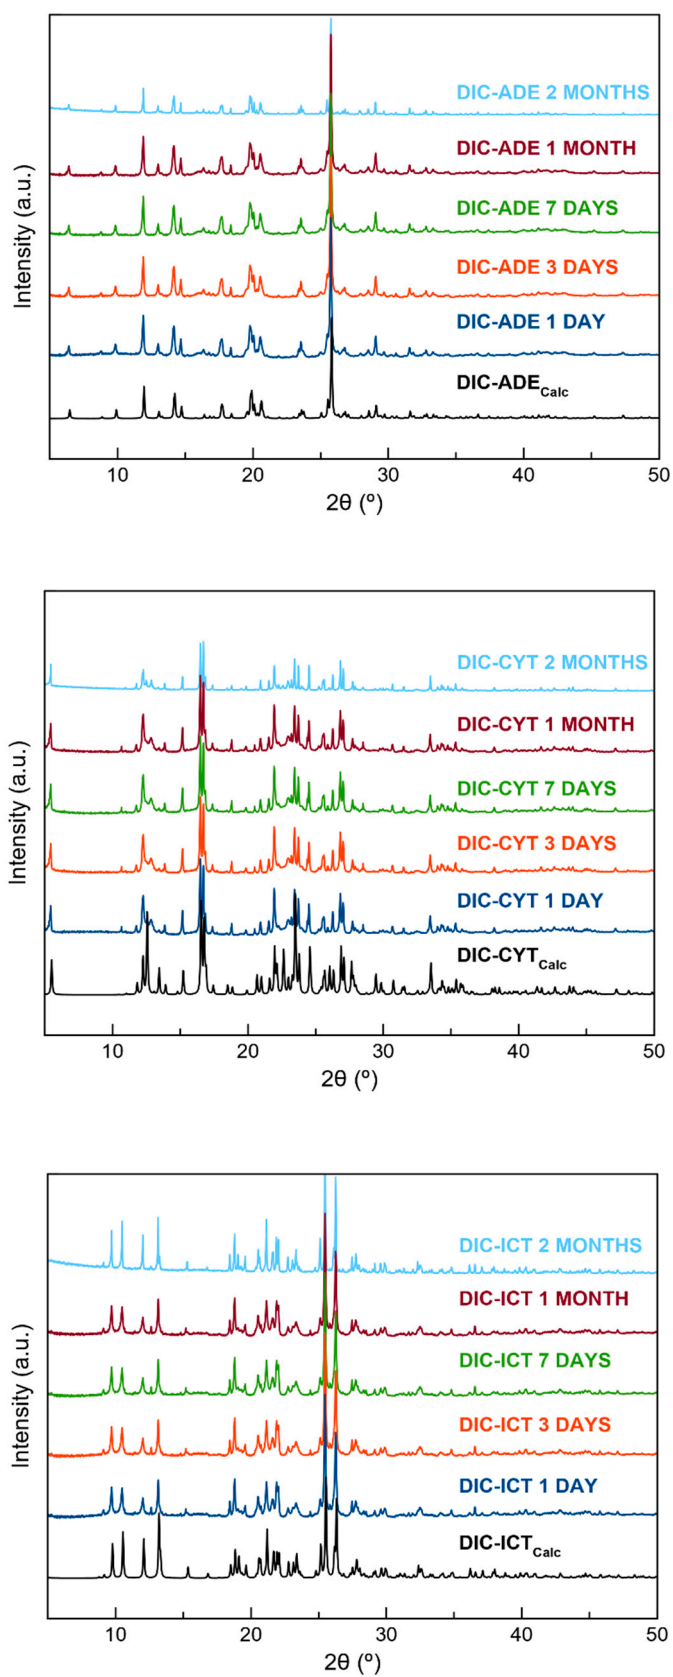

**Figure S6.** PXRD patterns of DIC-ADE (top), DIC-CYT (middle) and DIC-ICT (bottom) with respect to the stability under accelerated ageing conditions (40 °C, 75% RH) at different time intervals.

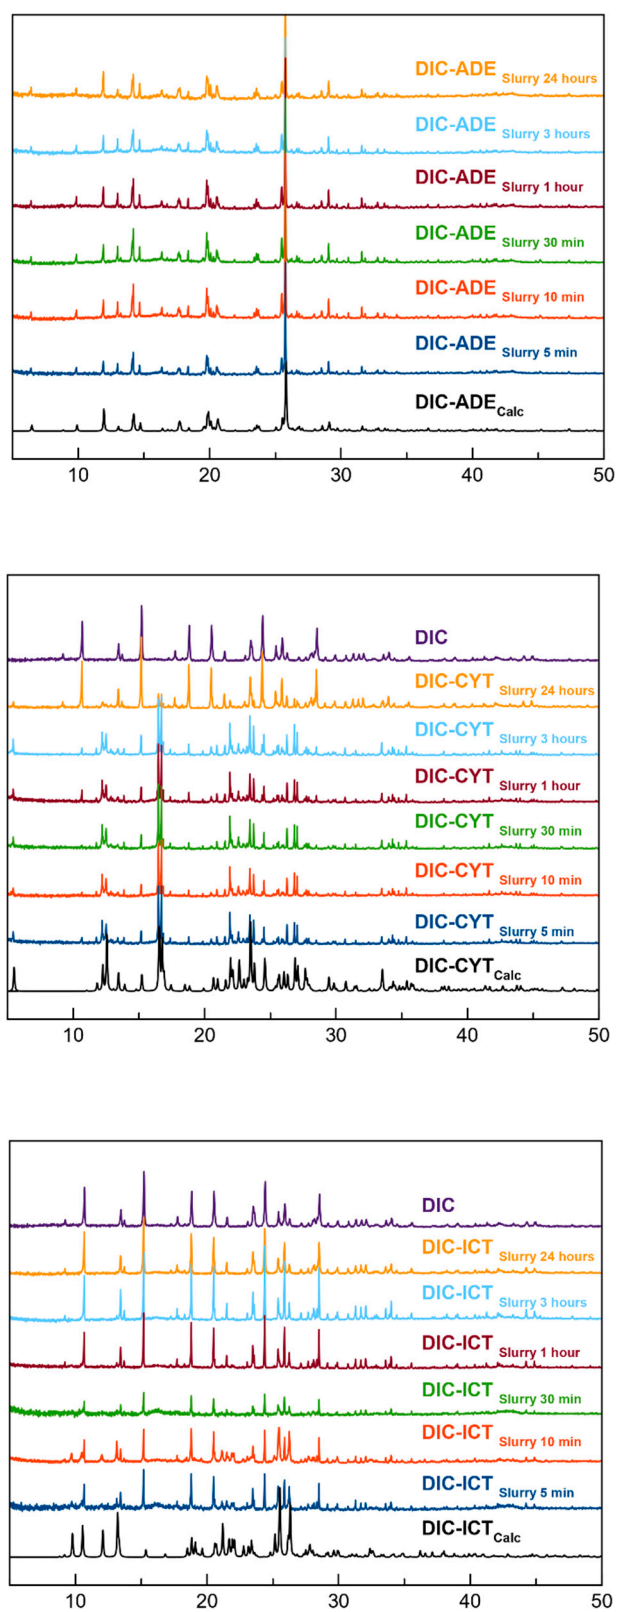

**Figure S7.** PXRD patterns of DIC-ADE (top), DIC-CYT (middle) and DIC-ICT (bottom) after the stability slurry assay (at 25 °C, during 24 h, in water).



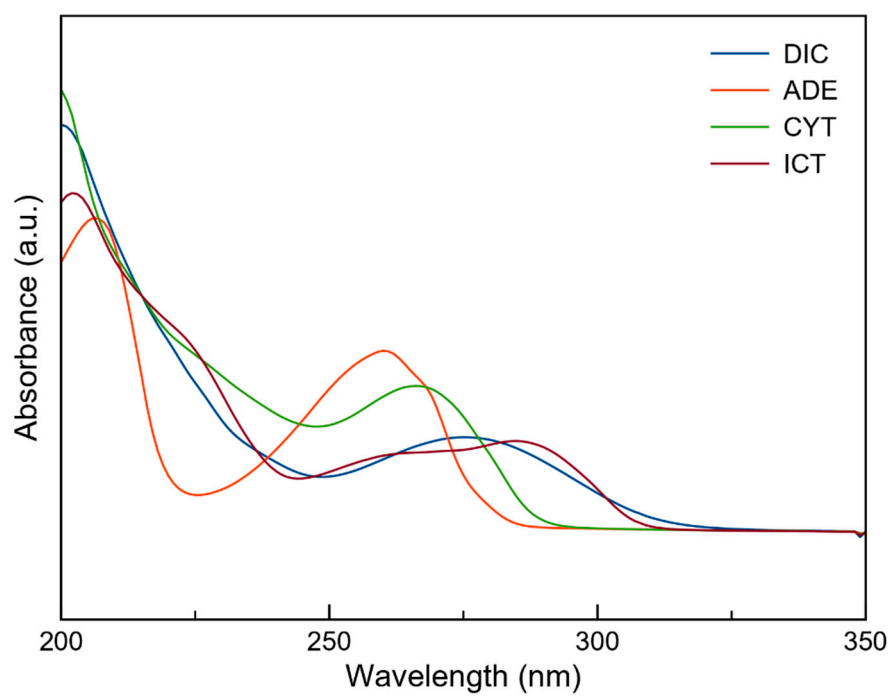

**Figure S8.** Overlapping UV spectra of diclofenac (DIC) and nucleobase cofomers (ADE: adenine, CYT: cytosine, ICT: isocytosine).

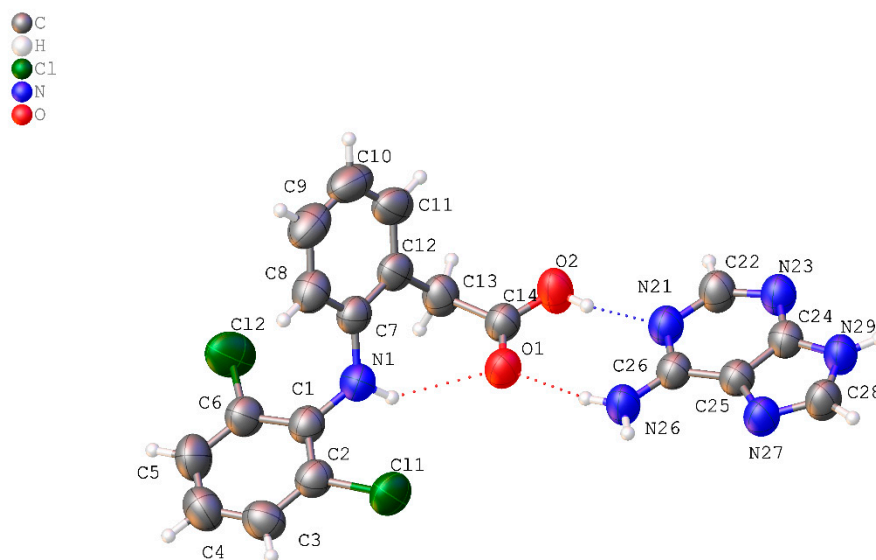

**Figure S9.** ORTEP representation showing the asymmetric unit of DIC—ADE with atom numbering scheme (thermal ellipsoids are plotted with the 50% probability level).

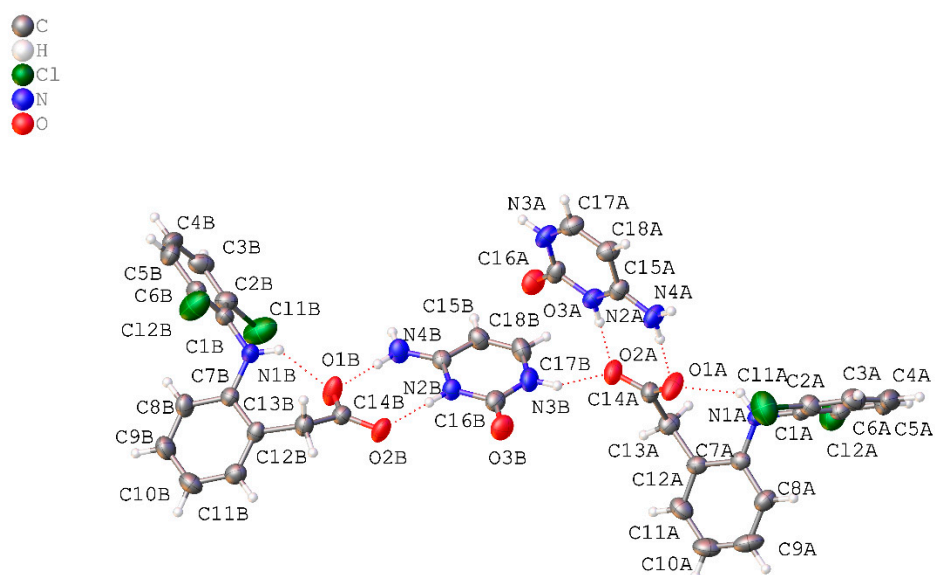

**Figure S10.** ORTEP representation showing the asymmetric unit of DIC—CYT with atom numbering scheme (thermal ellipsoids are plotted with the 50% probability level).

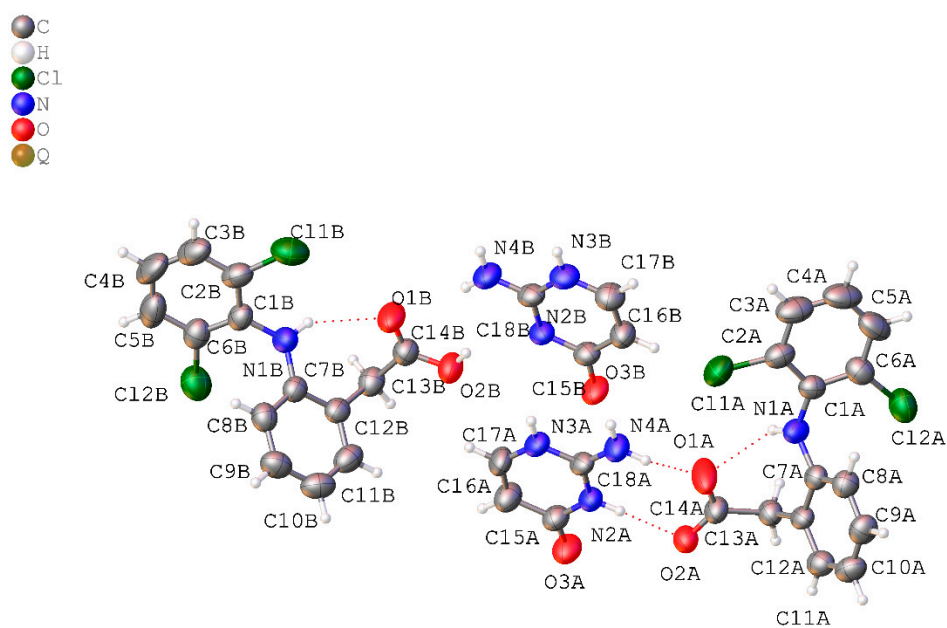

**Figure S11.** ORTEP representation showing the asymmetric unit of DIC–ICT with atom numbering scheme (thermal ellipsoids are plotted with the 50% probability level).

**Table S1.** Results of the LAG experiments between DIC and selected coformers.

| Coformer           | Solvent       | Result                      |
|--------------------|---------------|-----------------------------|
| Glycine            | MET, EOH, ACE | Physical mixture            |
| Proline            | EOH           | Cocrystal reported [11]     |
| Alanine            | MET, EOH, ACE | Physical mixture            |
| Glutamic Acid      | MET, EOH, ACE | Physical mixture            |
| Aspartic Acid      | MET, EOH, ACE | Physical mixture            |
| <b>Cytosine</b>    | <b>MET</b>    | <b>New phase, this work</b> |
| <b>Adenine</b>     | <b>MET</b>    | <b>New phase, this work</b> |
| Cysteine           | MET, EOH, ACE | Physical mixture            |
| Thymine            | MET, EOH, ACE | Physical mixture            |
| Phenylglycine      | MET, EOH, ACE | Physical mixture            |
| <b>Isocytosine</b> | <b>MET</b>    | <b>New phase, this work</b> |

**Table S2.** Hydrogen bonds for DIC—ADE [ $\text{\AA}$  and deg.].

| D-H...A                | d(D-H) | d(H...A) | d(D...A) | <(DHA) |
|------------------------|--------|----------|----------|--------|
| O(2)-H(2)...N(21)      | 0.82   | 1.84     | 2.650(2) | 169.0  |
| N(1)-H(1)...O(1)       | 0.86   | 2.38     | 3.005(2) | 129.7  |
| N(26)-H(26A)...O(1)    | 0.86   | 2.10     | 2.946(3) | 169.0  |
| N(26)-H(26B)...N(27)#1 | 0.86   | 2.10     | 2.933(3) | 162.5  |
| N(29)-H(29)...N(23)#2  | 0.86   | 2.00     | 2.847(3) | 166.6  |

Symmetry transformations used to generate equivalent atoms:

#1  $-x+2, -y+1, -z$     #2  $-x+3, -y+2, -z$

**Table S3.** Hydrogen bonds for DIC—CYT [Å and deg.].

| D-H...A                | d(D-H) | d(H...A) | d(D...A) | <(DHA) |
|------------------------|--------|----------|----------|--------|
| N(1A)-H(1A)...O(1A)    | 0.86   | 2.18     | 2.739(7) | 122.1  |
| N(1B)-H(1B)...O(1B)    | 0.86   | 2.17     | 2.737(6) | 123.3  |
| N(2A)-H(2A)...O(2A)    | 0.86   | 1.92     | 2.778(7) | 176.3  |
| N(3A)-H(3AA)...O(2B)#1 | 0.86   | 1.96     | 2.729(6) | 148.9  |
| N(4A)-H(4AA)...O(1A)   | 0.86   | 1.85     | 2.705(7) | 178.0  |
| N(4A)-H(4AB)...O(3A)#2 | 0.86   | 1.98     | 2.840(7) | 179.1  |
| N(2B)-H(2B)...O(2B)    | 0.86   | 1.92     | 2.780(6) | 176.5  |
| N(3B)-H(3BA)...O(2A)   | 0.86   | 1.94     | 2.727(6) | 152.2  |
| N(4B)-H(4BA)...O(1B)   | 0.86   | 1.84     | 2.699(7) | 178.4  |
| N(4B)-H(4BB)...O(3B)#3 | 0.86   | 1.99     | 2.851(7) | 178.5  |

Symmetry transformations used to generate equivalent atoms:

#1  $x, y-1, z$     #2  $x-1/2, -y, z$     #3  $x+1/2, -y+1, z$

**Table S4.** Hydrogen bonds for DIC—ICT [Å and deg.].

| D-H...A                | d(D-H) | d(H...A) | d(D...A)  | <(DHA) |
|------------------------|--------|----------|-----------|--------|
| N(1A)-H(1A)...O(1A)    | 0.86   | 2.26     | 2.846(9)  | 125.5  |
| O(2B)-H(2B)...N(2B)#1  | 0.82   | 1.80     | 2.618(9)  | 171.7  |
| N(1B)-H(1B)...O(1B)    | 0.86   | 2.41     | 3.000(10) | 126.4  |
| N(2A)-H(2A)...O(2A)    | 0.86   | 1.99     | 2.844(8)  | 174.0  |
| N(3A)-H(3AA)...O(3B)#1 | 0.86   | 2.03     | 2.774(9)  | 144.5  |
| N(4A)-H(4AA)...O(3B)#1 | 0.86   | 2.01     | 2.761(8)  | 146.0  |
| N(4A)-H(4AB)...O(1A)   | 0.86   | 1.82     | 2.637(9)  | 158.1  |
| N(3B)-H(3BA)...O(2A)#2 | 0.86   | 1.91     | 2.768(8)  | 178.7  |
| N(4B)-H(4BA)...O(1B)#3 | 0.86   | 2.02     | 2.864(11) | 166.4  |
| N(4B)-H(4BB)...O(3A)#2 | 0.86   | 2.09     | 2.829(9)  | 144.2  |

Symmetry transformations used to generate equivalent atoms:

#1  $x+1, y, z$     #2  $x+1, y-1, z$     #3  $x-1, y, z$
